# 1 Anti-allergic and anti-inflammatory activities of black 2 cumin extracts in *in vitro* and *in vivo* model systems

3  
4 Nazma Shaheen <sup>1,\*</sup>, Afiatul Azam <sup>1</sup>, Amlan Ganguly <sup>2</sup>, Saeed Anwar <sup>3</sup>, Md. Sorwer Alam  
5 Parvez <sup>3</sup>, Ujwal Punyamurtula <sup>4</sup>, Md. Kamrul Hasan <sup>5</sup>

6  
7 <sup>1</sup> Institute of Nutrition and Food Science, University of Dhaka, Dhaka 1000, Bangladesh; [nazmashaheen@du.ac.bd](mailto:nazmashaheen@du.ac.bd); [nzmshaheen58@gmail.com](mailto:nzmshaheen58@gmail.com) (N.S.); [afiatulazam@gmail.com](mailto:afiatulazam@gmail.com) (A.A.);

8  
9 <sup>2</sup> Department of Clinical Pharmacy and Pharmacology, Faculty of Pharmacy, University of Dhaka,  
10 Dhaka 1000, Bangladesh; [gangulyamlan@du.ac.bd](mailto:gangulyamlan@du.ac.bd) (A.G.);

11 <sup>3</sup> Department of Genetic Engineering and Biotechnology, School of Life Sciences, Shahjalal Uni-  
12 versity of Science and Technology, Sylhet 3114, Bangladesh; [saeedanwar.geb@gmail.com](mailto:saeedanwar.geb@gmail.com) (S.A.);  
13 [sorwersust@yahoo.com](mailto:sorwersust@yahoo.com) (M.S.A.P.);

14 <sup>4</sup> COBRE Center for Cancer Research Development, Proteomics Core Facility, Rhode Island Hos-  
15 pital, Providence, RI 02903, USA; [ujwal\\_punyamurtula@brown.edu](mailto:ujwal_punyamurtula@brown.edu) (U.P.);

16 <sup>5</sup> Department of Biochemistry and Molecular Biology, Tejgaon College, National University, Gazi-  
17 pur 1704, Bangladesh; [kamrulhasanhriday205@gmail.com](mailto:kamrulhasanhriday205@gmail.com) (M.K.H.).  
18

19  
20 \* Correspondence:

21 Dr. Nazma Shaheen

22 Professor,

23 Institute of Nutrition and Food Science,

24 University of Dhaka,

25 Dhaka-1000

26 Contact- +8801747799562

27 Email - [nzmshaheen58@gmail.com](mailto:nzmshaheen58@gmail.com), [nazmashaheen@du.ac.bd](mailto:nazmashaheen@du.ac.bd)  
28

29

30

31

32

33

34

35

36

37

38

39

40

41

## 42 **Abstract**

43 Black cumin (*Nigella sativa*) is a widely used ingredient of traditional medicine for its broad-  
44 spectrum pharmacological actions, including anti-allergic, bronchial asthma, and anti-in-  
45 flammatory properties. We sought to evaluate BC extracts' efficacy for their anti-allergic and  
46 anti-inflammatory properties using a comprehensive *in vitro*, *in vivo*, and *silico* experimental  
47 setup. To investigate whether BC extract has anti-inflammatory, anti-allergic, and analgesic  
48 therapeutic potentials *in vitro* and *in vivo*. The activity of BC was assessed through anti-  
49 allergic activity on rat basophilic leukemia-2H3 cell line, anti-inflammatory activity on  
50 J774.1A cell line, anti-inflammatory activity by carrageenan-induced rat paw edema, anal-  
51 gesic activity by acetic acid-induced writhing test, and ingenuity analysis of the BC extracts  
52 in inflammation control. BC exerted potent anti-allergic activity by inhibiting antigen-in-  
53 duced degranulation. An anti-inflammatory effect is shown by inhibiting TNF- $\alpha$  production.  
54 The acetic acid-induced writhing test shown a dose-dependent reduction of writhing number  
55 following BC administration. Rat paw edema test shown the dose-dependent reduction of  
56 paw edema volume following BC administration. Ingenuity Pathway Analysis (IPA) sug-  
57 gested BC extracts containing ferulic acid, p-coumaric acid, kaempferol, and quercetin can  
58 inhibit inflammation. This study suggests that bioactive compounds in BC extract act as an  
59 anti-allergic and anti-inflammatory agent by regulating several downstream and upstream  
60 inflammation pathways.

61 **Keywords:** Black cumin; *Nigella sativa*; anti-allergy; anti-inflammation; edema

## 62 **Abbreviations**

63 BC, Black cumin; RBL, Rat basophilic leukemia; IPA, Ingenuity Pathway Analysis; AWA,  
64 Acetone-water-acetic acid; DMSO, Dimethyl sulfoxide.

65

## 66 **Introduction**

67 Inflammation is a fundamental part of the body's physiological defense mechanisms  
68 against pathogenic infections and toxic substances [1]. It is involved in the body's response  
69 to both the initial cause and the consequences of an injury. Often, however, inflammations  
70 can be triggered inappropriately, leading to tissue destruction, which in turn can result in a  
71 range of inflammatory disorders, including rheumatoid and gouty arthritis, psoriasis, and  
72 Crohn's disease [2]. Many studies suggest that a persistent inflammatory condition can be  
73 pervasive and develop into more clinically severe afflictions, including cardiovascular dis-  
74 ease and cancer, often with fatal outcomes [3] [2] [4].

75

76 Current management strategies for inflammatory diseases include medications, relaxa-  
77 tion, exercise, and surgery to correct joint damage. The medications used to treat inflamma-  
78 tory diseases, such as non-steroidal anti-inflammatory drugs, corticosteroids, cyclophospha-  
79 mide, hydroxy-chloroquine, and biologic drugs, possibly minimize disease progression by  
80 lowering joint pain, swelling, and the inflammation itself [5] [6] [7] [8]. The type of manage-  
81 ment strategy is contingent on many factors, including the patient's age, medical background  
82 and comorbidity, immunity status, and the severity of the symptoms of inflammatory disease  
83 [5] [8]. However, the efficacy of these management strategies can be questionable, and even  
84 if the efficacy is satisfactory, many of these strategies are often not suitable for all patients  
85 because of associated side effects [9]. Both steroidal and non-steroidal inflammatory drugs  
86 are associated with a high range of adverse effects in the long-term [10] [11]. There is thus a  
87 constant push toward the development of an effective and curative therapeutic strategy to  
88 treat inflammatory diseases.

89

90 Medicinal plants are an essential source of bioactive compounds with potential thera-  
91 peutic efficacy [12]. Pharmacological investigations of medicinal plants can yield primers  
92 for the effective treatment of inflammatory diseases [12]. Black Cumin (BC, *Nigella sativa*  
93 L.) is a well-known medicinal plant used extensively in Unani, Ayurvedic, and Siddhi med-  
94 icine for centuries [13]. This herb, endemic to South Asian and Mediterranean countries, is  
95 rich in bioactive compounds, including tocopherols, alkaloids, saponins, and vitamins A and  
96 C, all of which contribute to its biological functionality [14] [15] [16]. Overwhelming evi-  
97 dence indicates the presence of bioactive ingredients in BC that can counteract the underlying  
98 pathophysiology of many diseases, including cancers, inflammatory conditions, cardiovas-  
99 cular defects, and autoimmune disorders [14] [17] [18]. Previous studies have highlighted  
100 the probable anti-inflammatory and anti-analgesic activities of BC [19] [20]. However, only  
101 a limited number of studies have explored BC's anti-inflammatory effects on subacute and  
102 chronic models of inflammation [20].

103 As a result, we sought to investigate the dose-response effects of the anti-inflammatory  
104 activity of BC in rats and mice with *in vitro* and *in vivo* anti-inflammatory, anti-allergic and  
105 anti-analgesic activities. Using these findings, the present study has taken an attempt to de-  
106 velop a probable mechanism of action for *N. sativa* through Ingenuity pathway analysis.

107

## 108 **Materials and Methods**

### 109 **Collection and preparation of black cumin samples**

110 Trained food sample collectors collected the samples from New market Kancha Bazar,  
111 Dhaka, Bangladesh and then critical checking of BC seed samples by the expert faculty mem-  
112 ber of the Department of Botanist, University of Dhaka. Preparation and processing of the

113 collected samples were done using standard operating procedures. Processing involved dry-  
114 ing of the fresh samples at 25 - 30°C, grinding by an electric blender, and preserving in an  
115 airtight container until analysis.

## 116 **Extraction procedure**

117 Multiple rounds of sequential extraction (initially by hexane/dichloromethane (1:1 v/v)  
118 (Merck, Germany; hexane- 296090, dichloromethane- 270997) and then by AWA (ace-  
119 tone/water/acetic acid 70:29.5:0.5) (Merck, Germany; acetone- 650501, acetic acid- A16283)  
120 was performed in an accelerated solvent extraction equipment known as ASE 200 (DIONEX,  
121 USA, catalogue number: 055422). A detailed description of the extraction procedure has  
122 been reported elsewhere [21] [22]. While ground samples were directly mixed with Dimethyl  
123 sulfoxide (DMSO) (Sigma Aldrich, #D- 2650 Poland) to get the sample extracts for  
124 assessment of anti-allergic and anti-inflammatory activities in *in vitro* cell line models, *in*  
125 *vivo* assessments conducted in this study mixed dried AWA extracts with DMSO to prepare  
126 the sample extracts.

## 127 **Experimental animal**

128 Swiss Albino mice (5 - 6 weeks of age; 20 - 30 grams) and Long-Evans rats (7 - 8 weeks of  
129 age; 100 - 130 grams) were collected from the Animal Research Branch, International Centre  
130 for Diarrheal Disease Research, Bangladesh (ICDDR, B). The animal were housed in poly-  
131 vinyl cages and maintained under standard laboratory conditions (temperature  $25 \pm 2^\circ\text{C}$ ) and  
132 a 12 h light - 12 h dark cycles for seven days. The animals were fed on standard laboratory  
133 animal diet formulated by ICDDR, B and water *ad libitum*. To keep the hydration rate con-  
134 stant, food and water were stopped 12 h before the experiments. The Ethical and Animal Care  
135 Committee of the Institute of Nutrition and Food Sciences, University of Dhaka, Bangladesh,  
136 critically reviewed and approved this study involving *in vivo* models. The procedures de-

137 scribed in this study were conducted in accordance with the Bangladesh Biosafety and Bi-  
138 osecurity guidelines 2019 and institutional oversight performed by qualified veterinarians  
139 [23].

#### 140 **Anti-allergic activity on rat basophilic leukemia-2H3 cell line**

141 Rat basophil leukemia (RBL)-2H3 cells [NIHS (JCRB), Tokyo, Japan: Cell No.: JCRB  
142 0023] were used to study the anti-allergic activities of BC extracts. RBL-2H3 cells were  
143 grown in minimal essential medium (Eagle) containing 15% fetal calf serum. We then inoc-  
144 ulated  $0.5 \times 10^5$  cells in each well of a 24-well plate and incubated at  $37^\circ\text{C}$  in an environment  
145 of 5% carbon dioxide for affluent growth. After overnight incubation ( $4 \times 10^6$  cells in each  
146 well of a 24-well plate), mouse monoclonal anti-DNP IgE (Sigma Aldrich #A- 6661, UK)  
147 solution was added to each of the 24 wells before incubation (for two hours at  $37^\circ\text{C}$ ).

148 The cells were then incubated with 10  $\mu\text{l}$  of DNP labeled human serum albumin for 30  
149 minutes. Supernatants were separated after lysis of cells with 500  $\mu\text{l}$  of Triton X - 100. The  
150 cell lysate (50  $\mu\text{l}$ ) along with the collected supernatant was transferred to the 96-well plate  
151 and mixed with 100  $\mu\text{l}$  of 0.1 M citrate buffer containing 3.3 mM para-nitrophenyl-2-acet-  
152 amide- $\beta$ -D-glucopyranoside (Wako, Japan). The supernatant-cell lysate mix was then kept  
153 under incubation for 25 minutes at  $37^\circ\text{C}$ ; it was followed by an addition (100  $\mu\text{l}$ ) of 2 M  
154 glycine buffer of pH 10.0 which stopped the reaction in a microplate reader and measurement  
155 of the absorbance. A stop solution was added to the lower four lanes which were used as  
156 control, and then at the same time, the substrate was added to the experimental well.

157 Blank without antigen and another negative control were used as a positive control with  
158 antigen and 5  $\mu\text{M}$  of wortmannin (Wako, Japan) solution. Blank, negative control, and posi-  
159 tive control were prepared by adding 490  $\mu\text{l}$  of modified Tyrode's buffer and 200 folds diluted  
160 wortmannin solution.

#### 161 **Anti-inflammatory activity on J774.1A cell**

162 Anti-inflammatory potential using J774.1A cell assay was assessed using the method as  
163 reported by Herath et al. [24]. Shortly, ground BC seed samples were mixed with DMSO to  
164 prepare 4mg/ml concentration and final strength of 40 µg/ml was employed in the assay me-  
165 dia. For the assay, a clear supernatant was obtained by centrifuging that mixture at 3000 rpm  
166 for 5 minutes. Mouse macrophages J774A.1 cell line [NIHS (JCRB) 9108] were cultured in  
167 Dulbecco's Modified Eagle Media (DMEM) (Sigma Aldrich #D-5030, USA) with 10% fetal  
168 calf serum and penicillin and streptomycin (Sigma Aldrich #F-7524, UK) at a concentration  
169 of 100 U/mL. The cells were incubated at 37°C in the incubator with an atmosphere of 5%  
170 CO<sub>2</sub>, 95% air.

171

172 The cell suspension with the concentration of  $5.0 \times 10^5$  cell /ml (200 µl/well) was placed  
173 in 96 well culture plates and incubated overnight (37°C, 5% CO<sub>2</sub>-95% air). Overnight cul-  
174 tured cells washed thrice with Hank's solution (Sigma Aldrich #6648, UK) (37°C) after re-  
175 moval of culture media prior to the addition of 180 µl DMEM and followed 20 µl of 10 times  
176 diluted sample extracts (final concentration, 40 µg/ml) to the each well without lipopolysac-  
177 charides (LPS). On the other hand, 160 µl DMEM with 20 µl of LPS (final concentration,  
178 1.0 µg/ml) after the addition of the test samples and incubated further for more than four  
179 hours. Cell supernatant was then collected for the assay of the TNF-α production, assayed by  
180 using Mouse TNF-α ELISA kit (Ready-Set-Go, eBioscience, USA). In brief, 50 µl of TNF-  
181 α capture antibody (250 times diluted) was added into 96 well plates and kept in the refrig-  
182 erator (4°C) overnight. The plate was washed with 300 µl of PBS-T (0.05% Tween20 in PBS)  
183 3 times in a sera washer (Model MW-96F., Biotech, Japan) and 100 µl of assay diluents  
184 solution was added as blocking solution. After incubation for 1 hour at room temperature, the  
185 plate was washed and 50 µl of cell supernatant /standard. TNF-α was added into the wells  
186 according to plate design. Sample extract-treated cell supernatant was diluted 10 times with  
187 assay diluents, whereas, the standard was added to maintain the final concentration from 0 to

188 1000 pg/ml and further incubated for 2hour at RT. After at least 2 hrs incubation, plates were  
189 washed again and TNF- $\alpha$  detection antibody (250 times diluted) was added (50  $\mu$ l) into each  
190 well and further incubated for 1hour. Avidin- HRP antibody solution (250 times diluted) was  
191 added in the same volume as earlier after washing and kept 30 minutes at RT. Finally, 50  $\mu$ l  
192 of TMB-HRP substrate solution was added and incubated for 15 min., a stop solution (25  $\mu$ l)  
193 was added into each well to stop the reaction and the absorbance was read in the microplate  
194 reader (model 550; Bio Rad, CA, USA) at 450 nm. From the absorbance data, the inhibition  
195 effect of food extracts on TNF- $\alpha$  production was calculated from the standard graph. Dose-  
196 response was done for the samples which had an inhibitory effect on TNF- $\alpha$  production at  
197 the concentrations of 40, 10, 3, and 1  $\mu$ g/ml.

#### 198 **Assessment of anti-inflammatory activity by carrageenan-induced rat paw edema**

199 Evaluation of anti-inflammatory activity was conducted *in vivo* in the Long Evans rat  
200 model. At first 200 mg of samples (i.e., dried AWA extract) were mixed with 5.0 ml of  
201 DMSO in a shaking-incubator at 130 rpm overnight. Then the mixture was centrifuged at  
202 3000 rpm for 5.0 minutes. Then the supernatant was collected and pipetted 500  $\mu$ L of aliquots  
203 to store at 25°C.

204 To determine anti-inflammatory activity, edema was induced by the phlogistic agent  
205 carrageenan [25]. The control group (n=3) received normal saline per os (p.o) (10 ml/kg),  
206 while group 2 received a standard drug, Diclofenac sodium (50 mg/kg, p.o). The rest of the  
207 groups were given 800 (n=3), 400 (n=3), and 200 mg/kg body weight (n=3) p.o. of extract  
208 preparations. Thirty minutes after administering sample extracts, each rat received 0.1 ml of  
209 1% (w/v) carrageenan (injected into the sub-plantar region of the right hind paw subcutane-  
210 ously) (Sigma Aldrich, # C-1013, Germany). Paw volumes of the right hind paw of each rat  
211 were measured by plethysmometer before and 1, 2, 3, and 4 hours after carrageenan injection  
212 to determine the edema volume. The hind paw volume was evaluated for anti-inflammatory



213 activity and expressed as % inhibition of the hind paw volume, which was calculated by the  
214 following equation:

$$215 \quad \% \text{ inhibition} = [(V_c - V_t)/V_c] \times 100$$

216 Here,  $V_c$  = average paw volume of the control group, and  $V_t$  = Average paw volume of  
217 the treated group.

### 218 **Assessment of analgesic activity by acetic acid-induced writhing test**

219 Peripheral analgesic activity of the extracts was determined by the acetic-acid-induced  
220 writhing inhibition method in mice [26]. The control group (n=3) (group 1) received normal  
221 saline (10 ml/kg, p.o.). Group 2 received a reference drug Diclofenac sodium (50 mg/kg,  
222 p.o.). The rest of the groups received 800 (n=3), 400 (n=3), and 200 mg/kg body weight (n=3)  
223 p.o. of dried AWA sample extracts. After 30 min of treatment, each mouse was administered  
224 intraperitoneally with 0.6% acetic (10 ml/kg). Later, the writhing numbers of each mouse  
225 were observed for 10 minutes. To evaluate the level of analgesia, writhing numbers of the  
226 sample treated mice were compared with the writhing numbers of the control groups. Per-  
227 cent-inhibition of writhing was calculated using the following equation:

$$228 \quad \% \text{ inhibition of writhing} = [(W_c - W_t)/W_c] \times 100$$

229 Here,  $W_c$  = Average number of the writhing of the control group, and  $W_t$  = Average  
230 number of the writhing of the treated group.

### 231 **Ingenuity analysis of the BC extracts in inflammation control**

232 We evaluated the effects of the compounds extracted from BC using the knowledge-  
233 based path explorer feature of the Ingenuity Pathway Analysis (IPA) tool [27] [28]. We ex-  
234 plored new ingenuity-based pathways that showed the relationship between the genes in-  
235 volved in the biosynthetic pathways of inflammation-related compounds (e.g., arachidonic  
236 acids, prostaglandins, and leukotrienes) and compounds in the BC extracts, which includes  
237 ferulic acid, quercetin, p-coumaric acid, and kaempferol. The shortest possible pathways

238 were generated individually for each compound where the compounds in the BC extracts  
239 were set as the initial compound, and inflammation-related compounds were selected as the  
240 target.

## 241 **Results**

### 242 ***In vitro* screening for anti-allergic effect**

243 As compared to the negative control, BC extracts produced 46.9% (SD  $\pm$ 7.1) inhibition  
244 of the antigen-induced degranulation of RBL-2H3 cells. AWA extracts produced increased  
245 inhibition compared to the DMSO extracts for 5, 10, 20, and 40  $\mu$ g/ml concentration. How-  
246 ever, at higher concentrations, e.g., 40  $\mu$ g/ml, both extracts produced comparable inhibition  
247 (Figure 1).

### 248 ***In vitro* screening for anti-inflammatory effect**

249 In the preliminary evaluation of anti-inflammatory effects on J774A.1 cell, 40  $\mu$ g/mL of  
250 DMSO extracts of BC resulted in significant (70%) inhibition of TNF- $\alpha$  production. Dose-  
251 response analysis showed that 1, 3, 10, and 40  $\mu$ g/mL of DMSO extracts could produce up  
252 to 70% inhibition in the TNF- $\alpha$  production.

### 253 ***In vivo* anti-inflammatory activity**

254 Four hours after carrageenan injection, the maximum volume of edema in control Long  
255 Evans adult rat models was  $1.18 \pm 0.03$  ml. Another group of rats pretreated with Diclofenac  
256 sodium (reference drug; 50 mg/kg, p.o), showed significantly reduced ( $p < 0.05$ ) edema in  
257 the paw. Dose-response analysis of DMSO extract of BC produced a significant inhibition  
258 of paw edema in Long Evans adult rats in a dose-dependent manner at 200, 400, and 800  
259 mg/kg, p.o administration of carrageenan ( $p < 0.05$ ) (Table 1).

260 The maximum inhibition of rat paw edema by BC was noted 4 hours after administration  
261 of carrageenan at a dose of 800 mg/kg, p.o. compared to the control but less than the reference  
262 drug. Figure 2 shows the changes of percent inhibition of carrageenan-induced paw edema  
263 volume at 1, 2, 3, and 4 h at the doses of 800 mg/kg, p.o by the DMSO extract of BC when  
264 compared to the control.

### 265 ***In vivo* analgesic activity**

266 The effects of DMSO extract of BC on 0.6% acetic acid-induced writhing in Swiss albino  
267 mice are summarized in Table 2. A dose-dependent and significant ( $p < 0.05$ ) reduction in the  
268 number of abdominal constrictions induced by intraperitoneal administration of 0.6% acetic  
269 acid was observed with oral administration of BC, at the doses of 200, 400, and 800 mg/kg,  
270 p.o when compared to the control. Among the different doses, the DMSO extract of BC at  
271 the dose of 800 mg/kg exhibited the maximum inhibition of the number of writhing compared  
272 to that of control.

273 The maximum inhibition of rat paw edema by BC was noted 4 hours after admin-  
274 istration of carrageenan at a dose of 800 mg/kg, p.o. compared to the control but less than  
275 the reference drug. Figure 2 shows the changes of percent decrease in carrageenan-induced  
276 paw edema volume at first, second, third, and fourth hours post-administration of 800  
277 mg/kg, p.o of DMSO extract of BC when compared to the control.

### 278 ***In silico* analysis provides insights into the mechanism of how BC extracts reduce in- 279 flammation**

280 The *in-silico* analysis of the bioactive compounds of BC illustrates a facet reactome de-  
281 picting potential models of how BC extracts reduce inflammation in humans (Figure 3, S1  
282 Table). Both prostaglandin and leukotriene synthesize from the arachidonic acid. Quercetin,  
283 p-coumaric acid, and kaempferol reduce the expression of myc, MAPK, EGFR, and TNF, all

284 of which are involved in the upregulation of the expression of arachidonic acid. Conse-  
285 quently, quercetin, p-coumaric acid, and kaempferol downregulate the expression of arachi-  
286 donic acids.

287 Ferulic acid, another component in the BC extract, negatively induces the synthesis of  
288 phospholipids. Phospholipid biosynthesis is critically important for the synthesis of arachi-  
289 donic acids. Also, ferulic acids upregulate the expression of HMOX and nrf2, resulting in the  
290 reduction of prostaglandin E2 (PGE2). Moreover, all the compounds of the *Nigella* extract  
291 directly reduce the expression of cox1 and cox2, two essential factors for the synthesis of  
292 PGE2. Collectively, ferulic acid, quercetin, p-coumaric acid, and kaempferol help reduce  
293 inflammation by interfering with the extended arachidonic acid pathway (Figure 3; S1 Ta-  
294 ble).

## 295 **Discussion**

296 In this study, we demonstrate the *in vitro* dose-response of the DMSO extract of BC to  
297 evaluate the anti-inflammatory and analgesic activities in the experimental models. The in-  
298 hibition of the antigen-induced degranulation at the same concentration of 41 food samples  
299 was assayed in the rat basophilic leukemia RBL-2H3 cell line (data not shown). A further  
300 dose-response (40, 20, 10 and 5µg/mL) assay was carried out to confirm their anti-allergic  
301 activity of the bioactive compound as present in food samples and only DMSO, as well as  
302 AWA extract of BC, exhibited dose-response which support the concept that anti-allergic  
303 activity belongs to the phenolic compounds. Recent research findings showed that polyphe-  
304 nols, widely distributed among fruits, vegetables, and herbs, are widespread for their antiox-  
305 idant capacity [29]. They also reported that some of them could exert anti-allergic activities  
306 [30] [31] [29].

307 Carrageenan-induced paw edema in rat models is increasingly being employed to deter-  
308 mine anti-inflammatory effects in animal models. In response to carrageenan injection, the

309 formation of edema occurs in a biphasic process. Mast cells around the damaged tissue re-  
310 leased prostaglandin with histamine and serotonin mediate the first phase (1 - 2 h) of the  
311 carrageenan model. Bradykinin, leukotrienes, polymorphonuclear cells, and continuous se-  
312 cretion of prostaglandins from macrophages tissue mediate the second phase (3 - 5h) of the  
313 carrageenan model [32] [25]. Our study indicates that the DMSO extracts of BC exhibited  
314 significant ( $p < 0.05$ ) inhibition of paw edema in rats at the doses of 200, 400, and 800 mg/kg,  
315 p.o in the second phases of inflammatory response. DMSO extracts of BC at the dose of 800  
316 mg/kg produced the maximum inhibition of carrageenan-induced paw edema volume. The  
317 result of the present study showed the maximum inhibition of carrageenan-induced paw  
318 edema volume in rats by BC in the second phase of post carrageenan injection at 3-5 h, maybe  
319 due to the modulatory principles acting with the prostaglandin alley. Moreover, the present  
320 study supports the previous findings that BC seed polyphenol plays a crucial role as protec-  
321 tive factors against

322 “Acetic acid-induced writhing experiment” is a well-known protocol for assessing the  
323 analgesic potency of medicinal products [33]. Intraperitoneal injection of acetic acid that  
324 triggers pain sensation is due to the prostaglandins and lipoxygenase products from arachi-  
325 donic acid liberated from phospholipids by cyclooxygenase [34]. Thus, the significant  
326 ( $p < 0.05$ ) reduction of writhing in this study by DMSO extracts of BC at the doses of 200,  
327 400, and 800 mg/kg, p.o suggest analgesic activity peripherally mediated through inhibition  
328 of prostaglandins and other endogenous pain mediators. The highest concentration (800  
329 mg/kg) of the test samples exhibited a peak of analgesic effect significantly ( $p < 0.05$ ) in the  
330 acetic acid-induced writhing test. These results indicate the peripheral analgesic potential of  
331 the DMSO extracts of the test samples which could be exhibited due to the suppression of  
332 peritoneal surface receptors through inhibited cyclooxygenase activity. The current study  
333 findings show concordance with previous findings that BC seed polyphenol inhibits acetic  
334 acid-induced writhing in the mouse model [35].

335 Through an examination of the literature, we also note how to present findings confirm  
336 previous work in the field. Specifically, the *in vitro* and *in vivo* experiments performed in this  
337 study are in good agreement with those of prior experiments on BC's anti-inflammatory ac-  
338 tivity, lending credence to the idea that BC is a potent medicinal plant for therapeutic uses.

339 In addition to the wet-lab analysis, ingenuity pathway analysis provides evidence for the  
340 role of the *Nigella* extracts in the reduction of inflammation. Earlier studies revealed that  
341 some molecules including myc, MAPK, EGFR, TNF, are involved in the cellular responses  
342 for inducing the inflammation [36] [37] [38] [39]. We have found that compounds in the  
343 *Nigella* extracts, including ferulic acid, quercetin, p-coumaric acid, and kaempferol, down-  
344 regulates the inflammation-inducing signaling molecules in humans (Figure 3). The potential  
345 role of the activation of pKA, HMOX, and nrf2 pathways led to anti-inflammatory effects  
346 has been reported in many research groups [40] [41] [42] [43]. Our analysis uncovered that  
347 compounds in the *Nigella* extracts upregulate the pKA, HMOX, and nrf2 (Figure 3).

348 Furthermore, we have shown the potential aspects of the anti-inflammatory mecha-  
349 nism of BC that were previously only speculated upon. For example, Nasuti *et al.* found BC  
350 to reduce only the acute inflammation suggested that BC's mechanism of action is tied to  
351 interleukins, TNF, and prostaglandins [44]. In the ingenuity pathway analysis, we have  
352 shown various components of BC act through IL32, IL8, IL1, TNF, and PGE2 to reduce  
353 inflammation. In another study, researchers discovered that BC could decrease either IL-6  
354 levels of IL-1B levels, depending on its storage conditions [45]. These findings establish a  
355 connection between BC and interleukins in BC's anti-inflammatory activity, which we have  
356 at least partially outlined in Figure 3. Similarly, other researchers speculated that BC WSE  
357 inhibits COX2 and that BC inhibits prostaglandin synthesis through interaction with COX-1  
358 and COX-2 [46]. Both hypotheses are supported by the results of our Ingenuity pathway  
359 analysis, as depicted in Figure 3. Furthermore, Babar et al. suggested that phenols/polyphe-  
360 nols in BC might be responsible for its anti-inflammatory activity [46]. Through our pathway

361 analysis, we have found that these phenols and polyphenols are ferulic acid, p-coumaric acid,  
362 kaempferol, and quercetin. It is speculated that the inhibitory effect on the secretion of leu-  
363 kotrienes and prostaglandins by thymoquinone may be responsible for BC's anti-inflamma-  
364 tory activity [47]. We have shown that this is the case, although, instead of thymoquinone,  
365 quercetin and ferulic acid were found to be the components of BC responsible for this aspect  
366 of its anti-inflammatory mechanism. In another study, *N. sativa* showed superior activity in  
367 a screening of *Nigella* species for *in vitro* inhibition of PGE2 production catalyzed by COX1  
368 and COX2 [48]. This lends credence to the mechanistic schematic we have depicted in Figure  
369 3; as is shown in that diagram, several components of BC act to inhibit COX1/COX2 activity,  
370 which is indeed necessary to produce PGE2. In yet another study, researchers discovered that  
371 levels of erk are decreased upon *N. sativa* treatment of damaged rat lungs [49]. The erk re-  
372 pression discussed here is supported by our mechanistic analysis, which has found that  
373 kaempferol, a component of *N. sativa*, inhibits ERK1/2 activity. As evidenced by these ex-  
374 amples from the literature, the results we have found build on previous research to provide  
375 crucial insight into the medicinal properties of a common natural product.

376 Together with the *in vitro* and *in vivo* studies, the *in silico* analysis in this study provides  
377 strong evidence that the bioactive compounds in BC extract act as an anti-inflammatory agent  
378 by regulating several downstream and upstream pathways of inflammation.

## 379 **Conclusion**

380 In summary, the findings of the present study support that a BC extract has anti-inflamma-  
381 tory, anti-allergic, and analgesic activity. This study, involving *in vitro* and *in vivo* systems,  
382 indicates the possibility that BC extract might help treat pathologies that involve chronic  
383 inflammation and pain. Also, *in silico* analyses suggested that the phenolic compounds in BC  
384 extracts may play a key role in inhibiting inflammatory reactions in human? Besides, through

385 the Ingenuity pathway analysis, the present study has supported and elaborated on sugges-  
386 tions found in the literature regarding BC's biochemical mechanism of action. Thus, in un-  
387 derstanding how to present findings relate to prior work in the field, we have gained insight  
388 into the vitality of this research for future efforts to study the anti-inflammatory effects of *N.*  
389 *sativa*. Future studies should focus on elucidating the mechanistic pathways through which  
390 compounds in BC extracts exert such pharmacologic effects to prevent inflammation.

391 **Supplementary Materials:** Table S1: Components of the reactome *Nigella sativa* works on  
392 to impact on human inflammations.

393 **Acknowledgments:** We thank Aftab Uz Zaman Noor, MSc (Université Claude Bernard  
394 Lyon 1, France) for his in-kind assistance for conducting the silico study.

395 **Author Contributions:** Conceptualization, N.S. M.K.H., and S.A.; methodology, N.S.,  
396 A.A., A.G., S.A., M.K.H. and M.S.A.P.; software, S.A., and M.S.A.P.; validation and scruti-  
397 nization, N.S., M.K.H., and U.P.; investigation, N.S., A.A., A.G., S.A. and M.S.A.P.; formal  
398 analysis, N.S., A.A., A.G., S.A., and M.S.A.P.; writing—original draft preparation, A.A.,  
399 A.G., and S.A.; writing—review and editing, N.S., M.K.H., and U.P.; supervision, N.S.; pro-  
400 ject administration, N.S., and M.K.H.; funding acquisition, N.S.

401 **Competing Interest:** The authors do not have any conflicting interest.

402 **Approval for animal experiments:** Animals were housed at the Animal Housing Facility  
403 of Institute of Nutrition and Food Sciences, University of Dhaka, Bangladesh, following  
404 guidelines by their Ethics Committee for the Treatment of Laboratory Small Animals. All  
405 procedures were reviewed and approved by the Ethical and Animal Care Committee of the  
406 Biological Science faculty, University of Dhaka, Bangladesh. The committee's reference  
407 number is not available.

408 **Approval for human experiments:** Not applicable.

409 **Approval for experimental procedures:** All experimental procedures were approved by the  
410 internal committee of Biological Science faculty headed by Dean of Bioscience faculty, Uni-  
411 versity of Dhaka, Bangladesh.

412



413 **Informed consent:** Informed consent was obtained from all individual participants included  
414 in the study.

415 **Data availability:** Authors always welcome to share the data required for reviewers and  
416 other researchers.

417 **Funding:** The author(s) received no specific funding for this project.

## 418 **References**

- 419 [1] R. Medzhitov, “Origin and physiological roles of inflammation,” *Nature*, vol. 454,  
420 no. 7203. Nature Publishing Group, pp. 428–435, Jul. 24, 2008, doi:  
421 10.1038/nature07201.
- 422 [2] D. Okin and R. Medzhitov, “Evolution of inflammatory diseases,” *Current Biology*,  
423 vol. 22, no. 17. Curr Biol, Sep. 11, 2012, doi: 10.1016/j.cub.2012.07.029.
- 424 [3] D. Laveti *et al.*, “Anti-inflammatory treatments for chronic diseases: A review,”  
425 *Inflammation and Allergy - Drug Targets*, vol. 12, no. 5. Inflamm Allergy Drug  
426 Targets, pp. 349–361, 2013, doi: 10.2174/18715281113129990053.
- 427 [4] I. Roifman, P. L. Beck, T. J. Anderson, M. J. Eisenberg, and J. Genest, “Chronic  
428 inflammatory diseases and cardiovascular risk: A systematic review,” *Canadian*  
429 *Journal of Cardiology*, vol. 27, no. 2. Pulsus Group Inc., pp. 174–182, 2011, doi:  
430 10.1016/j.cjca.2010.12.040.
- 431 [5] H. Cheng, “Genetic Variation in Resistance to Inflammation and Infectious  
432 Disease,” in *Inflammatory Diseases - Immunopathology, Clinical and*  
433 *Pharmacological Bases*, InTech, 2012.
- 434 [6] B. R. R. De Mattos *et al.*, “Inflammatory bowel disease: An overview of immune  
435 mechanisms and biological treatments,” *Mediators of Inflammation*, vol. 2015.  
436 Hindawi Publishing Corporation, 2015, doi: 10.1155/2015/493012.
- 437 [7] A. Diaz-Borjon, C. M. Weyand, and J. J. Goronzy, “Treatment of chronic  
438 inflammatory diseases with biologic agents: Opportunities and risks for the elderly,”  
439 *Experimental Gerontology*, vol. 41, no. 12. Exp Gerontol, pp. 1250–1255, Dec.  
440 2006, doi: 10.1016/j.exger.2006.10.010.
- 441 [8] M. S. (Editor) Jean-Marc Cavaillon (Editor), “Inflammation: From Molecular and  
442 Cellular Mechanisms to the Clinic, 4 Volume Set | Wiley.”  
443 [https://www.wiley.com/en-](https://www.wiley.com/en-us/Inflammation%3A+From+Molecular+and+Cellular+Mechanisms+to+the+Clinic%2C+4+Volume+Set-p-9783527338993)  
444 [us/Inflammation%3A+From+Molecular+and+Cellular+Mechanisms+to+the+Clinic](https://www.wiley.com/en-us/Inflammation%3A+From+Molecular+and+Cellular+Mechanisms+to+the+Clinic%2C+4+Volume+Set-p-9783527338993)  
445 [%2C+4+Volume+Set-p-9783527338993](https://www.wiley.com/en-us/Inflammation%3A+From+Molecular+and+Cellular+Mechanisms+to+the+Clinic%2C+4+Volume+Set-p-9783527338993) (accessed Dec. 09, 2020).
- 446 [9] P. Li, Y. Zheng, and X. Chen, “Drugs for autoimmune inflammatory diseases: From  
447 small molecule compounds to anti-TNF biologics,” *Frontiers in Pharmacology*, vol.  
448 8, no. JUL. Frontiers Media S.A., Jul. 12, 2017, doi: 10.3389/fphar.2017.00460.

- 449 [10] A. P. Gor and M. Saksena, "Adverse drug reactions of nonsteroidal anti-  
450 inflammatory drugs in orthopedic patients," *J. Pharmacol. Pharmacother.*, vol. 2,  
451 no. 1, pp. 26–29, Jan. 2011, doi: 10.4103/0976-500X.77104.
- 452 [11] N. A. Hanania, K. R. Chapman, and S. Kesten, "Adverse effects of inhaled  
453 corticosteroids," *The American Journal of Medicine*, vol. 98, no. 2. Am J Med, pp.  
454 196–208, 1995, doi: 10.1016/S0002-9343(99)80404-5.
- 455 [12] A. G. Atanasov *et al.*, "Discovery and resupply of pharmacologically active plant-  
456 derived natural products: A review," *Biotechnology Advances*, vol. 33, no. 8.  
457 Elsevier Inc., pp. 1582–1614, Dec. 01, 2015, doi: 10.1016/j.biotechadv.2015.08.001.
- 458 [13] P. J. Houghton, R. Zarka, B. De Las Heras, and J. R. S. Houtl, "Fixed oil of *Nigella*  
459 *sativa* and derived thymoquinone inhibit eicosanoid generation in leukocytes and  
460 membrane lipid peroxidation," *Planta Med.*, vol. 61, no. 1, pp. 33–36, 1995, doi:  
461 10.1055/s-2006-957994.
- 462 [14] M. S. Butt and M. T. Sultan, "Nigella sativa: Reduces the risk of various maladies,"  
463 *Crit. Rev. Food Sci. Nutr.*, vol. 50, no. 7, pp. 654–665, 2010, doi:  
464 10.1080/10408390902768797.
- 465 [15] S. S. A. A. H. M. S. U. A. A. R. M. S. Javed, "Nutritional, phytochemical potential  
466 and pharmacological evaluation of *Nigella Sativa* (Kalonji) and *Trachyspermum*  
467 *Ammi* (Ajwain)," *J. Med. Plants Res.*, vol. 6, no. 5, pp. 768–775, Feb. 2012, doi:  
468 10.5897/jmpr11.1341.
- 469 [16] P. Paarakh, "Nigella sativa Linn.- A comprehensive review | Request PDF."  
470 [https://www.researchgate.net/publication/282051619\\_Nigella\\_sativa\\_Linn-](https://www.researchgate.net/publication/282051619_Nigella_sativa_Linn-_A_comprehensive_review)  
471 [\\_A\\_comprehensive\\_review](https://www.researchgate.net/publication/282051619_Nigella_sativa_Linn-_A_comprehensive_review) (accessed Dec. 09, 2020).
- 472 [17] E. Z. ; S. T. G. D. N. E. Dajani, "Overview of the preclinical pharmacological  
473 properties of *Nigella sativa* (black seeds): a complementary drug with historical and  
474 clinical significance - PubMed," Accessed: Dec. 09, 2020.  
475 <https://pubmed.ncbi.nlm.nih.gov/28195061/>.
- 476 [18] A. Tavakkoli, V. Mahdian, B. M. Razavi, and H. Hosseinzadeh, "Review on clinical  
477 trials of black seed (*Nigella sativa* ) and its active constituent, thymoquinone,"  
478 *Journal of Pharmacopuncture*, vol. 20, no. 3. Korean Pharmacopuncture Institute,  
479 pp. 179–193, Sep. 01, 2017, doi: 10.3831/KPI.2017.20.021.
- 480 [19] M. Ikhsan, N. Hiedayati, K. Maeyama, and F. Nurwidya, "Nigella sativa as an anti-  
481 inflammatory agent in asthma," *BMC Res. Notes*, vol. 11, no. 1, p. 744, Oct. 2018,  
482 doi: 10.1186/s13104-018-3858-8.
- 483 [20] H. N. Pise and S. L. Padwal, "Evaluation of anti-inflammatory activity of nigella  
484 sativa: An experimental study," *Natl. J. Physiol. Pharm. Pharmacol.*, vol. 7, no. 7,  
485 pp. 707–711, 2017, doi: 10.5455/njppp.2017.7.0204705032017.
- 486 [21] "Hydrophilic antioxidant capacities and total phenol content of seasonal fruits of  
487 Bangladesh - PubMed," *Malays. J. Nutr.*, vol. 18, no. 3, pp. 355–362, Dec. 2012,  
488 <https://pubmed.ncbi.nlm.nih.gov/24568076/>.
- 489 [22] N. Shaheen, A. B. Tukun, S. Islam, N. M. Irfan, I. N. Khan, and T. Hasan,

- 490 “Evaluation of functional potentiality of selected commonly consumed foods of  
491 Bangladesh,” *Funct. Foods Heal. Dis.*, vol. 6, no. 11, p. 735, Nov. 2016, doi:  
492 10.31989/ffhd.v6i11.278.
- 493 [23] “Bangladesh Biosafety and Biosecurity Guidelines for Handling and Disposal of  
494 Biohazardous Materials First Edition Bangladesh Biosafety and Biosecurity  
495 Society,” 2019. Accessed: May 31, 2021.  
496 [https://bdbiosafetysociety.org/uploads/documents/Bangladesh\\_Biosafety\\_and\\_Biosecurity\\_Guidelines.pdf?fbclid=IwAR1xpI5NX5I4g-t68zjKwMJ\\_eUGFzbfk4PdZ4ZC6\\_i7-dR00k2xTyu6E4o8](https://bdbiosafetysociety.org/uploads/documents/Bangladesh_Biosafety_and_Biosecurity_Guidelines.pdf?fbclid=IwAR1xpI5NX5I4g-t68zjKwMJ_eUGFzbfk4PdZ4ZC6_i7-dR00k2xTyu6E4o8).
- 499 [24] H. M. T. Herath, Y. Takano-Ishikawa, and K. Yamaki, “Inhibitory Effect of Some  
500 Flavonoids on Tumor Necrosis Factor- $\alpha$  Production in Lipopolysaccharide-  
501 Stimulated Mouse Macrophage Cell Line J774.1,” *J. Med. Food*, vol. 6, no. 4, pp.  
502 365–370, 2003, doi: 10.1089/109662003772519930.
- 503 [25] C. A. Winter, E. A. Risley, and G. W. Nuss, “Carrageenin-Induced Edema in Hind  
504 Paw of the Rat as an Assay for Antiinflammatory Drugs,” *Proc. Soc. Exp. Biol.*  
505 *Med.*, vol. 111, no. 3, pp. 544–547, 1962, doi: 10.3181/00379727-111-27849.
- 506 [26] B. A. Whittle, “The use of changes in capillary permeability in mice to distinguish  
507 between narcotic and nonnarcotic analgesics,” *Br. J. Pharmacol. Chemother.*, vol.  
508 22, no. 2, pp. 246–253, 1964, doi: 10.1111/j.1476-5381.1964.tb02030.x.
- 509 [27] L. Chindelevitch *et al.*, “Causal reasoning on biological networks: Interpreting  
510 transcriptional changes,” *Bioinformatics*, vol. 28, no. 8, pp. 1114–1121, Apr. 2012,  
511 doi: 10.1093/bioinformatics/bts090.
- 512 [28] A. Krämer, J. Green, J. Pollard, and S. Tugendreich, “Causal analysis approaches in  
513 ingenuity pathway analysis,” *Bioinformatics*, vol. 30, no. 4, pp. 523–530, Feb. 2014,  
514 doi: 10.1093/bioinformatics/btt703.
- 515 [29] D. P. Xu *et al.*, “Natural antioxidants in foods and medicinal plants: Extraction,  
516 assessment and resources,” *International Journal of Molecular Sciences*, vol. 18, no.  
517 1. MDPI AG, Jan. 05, 2017, doi: 10.3390/ijms18010096.
- 518 [30] T. Juríková, “Polyphenols and their Mechanism of Action in Allergic Immune  
519 ResponseImmune Response,” *Glob. J. Allergy*, vol. 1, no. 2, pp. 037–039, Oct. 2015,  
520 doi: 10.17352/2455-8141.000008.
- 521 [31] A. Singh, S. Holvoet, and A. Mercenier, “Dietary polyphenols in the prevention and  
522 treatment of allergic diseases,” *Clinical and Experimental Allergy*, vol. 41, no. 10.  
523 *Clin Exp Allergy*, pp. 1346–1359, Oct. 2011, doi: 10.1111/j.1365-  
524 2222.2011.03773.x.
- 525 [32] M. Di Rosa, J. P. Giroud, and D. A. Willoughby, “Studies of the mediators of the  
526 acute inflammatory response induced in rats in different sites by carrageenan and  
527 turpentine,” *J. Pathol.*, vol. 104, no. 1, pp. 15–29, 1971, doi:  
528 10.1002/path.1711040103.
- 529 [33] M. Afzal *et al.*, “Anti-inflammatory and analgesic potential of a novel steroidal  
530 derivative from *Bryophyllum pinnatum*,” *Fitoterapia*, vol. 83, no. 5, pp. 853–858,

- 531 Jul. 2012, doi: 10.1016/j.fitote.2012.03.013.
- 532 [34] R. Fish, P. Danneman, M. Brown, and A. Karas, *Anesthesia and Analgesia in*  
533 *Laboratory Animals*. Elsevier Inc., 2008.
- 534 [35] A. Ghannadi, V. Hajhashemi, and H. Jafarabadi, “An investigation of the analgesic  
535 and anti-inflammatory effects of *Nigella sativa* seed polyphenols,” *J. Med. Food*,  
536 vol. 8, no. 4, pp. 488–493, Dec. 2005, doi: 10.1089/jmf.2005.8.488.
- 537 [36] J. R. Bradley, “TNF-mediated inflammatory disease,” *Journal of Pathology*, vol.  
538 214, no. 2. *J Pathol*, pp. 149–160, Jan. 2008, doi: 10.1002/path.2287.
- 539 [37] B. Kaminska, “MAPK signalling pathways as molecular targets for anti-  
540 inflammatory therapy - From molecular mechanisms to therapeutic benefits,” in  
541 *Biochimica et Biophysica Acta - Proteins and Proteomics*, Dec. 2005, vol. 1754, no.  
542 1–2, pp. 253–262, doi: 10.1016/j.bbapap.2005.08.017.
- 543 [38] S. Rayego-Mateos *et al.*, “Role of epidermal growth factor receptor (EGFR) and its  
544 ligands in kidney inflammation and damage,” *Mediators of Inflammation*, vol. 2018.  
545 Hindawi Limited, 2018, doi: 10.1155/2018/8739473.
- 546 [39] F. Sipos, G. Firneisz, and G. Muzes, “Therapeutic aspects of c-MYC signaling in  
547 inflammatory and cancerous colonic diseases,” *World Journal of Gastroenterology*,  
548 vol. 22, no. 35. Baishideng Publishing Group Co., Limited, pp. 7938–7950, Sep. 21,  
549 2016, doi: 10.3748/wjg.v22.i35.7938.
- 550 [40] M. Alcaraz, P. Fernandez, and M. Guillen, “Anti-Inflammatory Actions of the Heme  
551 Oxygenase-1 Pathway,” *Curr. Pharm. Des.*, vol. 9, no. 30, pp. 2541–2551, Mar.  
552 2005, doi: 10.2174/1381612033453749.
- 553 [41] G. M. Campo *et al.*, “The inhibition of hyaluronan degradation reduced pro-  
554 inflammatory cytokines in mouse synovial fibroblasts subjected to collagen-induced  
555 arthritis,” *J. Cell. Biochem.*, vol. 113, no. 6, pp. 1852–1867, Jun. 2012, doi:  
556 10.1002/jcb.24054.
- 557 [42] G. M. Campo *et al.*, “Protein kinase a mediated anti-inflammatory effects exerted by  
558 adenosine treatment in mouse chondrocytes stimulated with IL-1 $\beta$ ,” *BioFactors*, vol.  
559 38, no. 6, pp. 429–439, Nov. 2012, doi: 10.1002/biof.1040.
- 560 [43] W. Tu, H. Wang, S. Li, Q. Liu, and H. Sha, “The Anti-Inflammatory and Anti-  
561 Oxidant Mechanisms of the Keap1/Nrf2/ARE Signaling Pathway in Chronic  
562 Diseases,” *Aging Dis.*, vol. 10, no. 3, p. 637, 2019, doi: 10.14336/ad.2018.0513.
- 563 [44] N. Cinzia *et al.*, “Effects of early life permethrin exposure on spatial working  
564 memory and on monoamine levels in different brain areas of pre-senescent rats,”  
565 *Toxicology*, vol. 303, pp. 162–168, Jan. 2013, doi: 10.1016/j.tox.2012.09.016.
- 566 [45] L. Bordoni *et al.*, “Antioxidant and anti-inflammatory properties of *nigella sativa* oil  
567 in human pre-adipocytes,” *Antioxidants*, vol. 8, no. 2, Feb. 2019, doi:  
568 10.3390/antiox8020051.
- 569 [46] Z. M. Babar *et al.*, “In vivo anxiolytic and in vitro anti-inflammatory activities of  
570 water-soluble extract (WSE) of *Nigella sativa* (L.) seeds,” *Nat. Prod. Res.*, 2019, doi:

571 10.1080/14786419.2019.1667348.

572 [47] M. U. Bashir, H. J. Qureshi, and T. Saleem, “Comparison of anti-inflammatory  
573 activity of *Nigella Sativa* and Diclofenac Sodium in *Albino* rats,” *J. Ayub Med. Coll.*  
574 *Abbottabad*, vol. 27, no. 3, pp. 523–526, 2015, Accessed: Dec. 09, 2020.  
575 <https://pubmed.ncbi.nlm.nih.gov/26720998/>.

576 [48] P. Landa, P. Marsik, J. Havlik, P. Kloucek, T. Vanek, and L. Kokoska, “Evaluation  
577 of antimicrobial and anti-inflammatory activities of seed extracts from six *Nigella*  
578 species,” *J. Med. Food*, vol. 12, no. 2, pp. 408–415, Apr. 2009, doi:  
579 10.1089/jmf.2007.0600.

580 [49] A. Aslan, D. Boydak, M. I. Can, and T. Kuloglu, “*Nigella sativa* improves the  
581 carbon tetrachloride-induced lung damage in rats through repression of erk/akt  
582 pathway,” *Bangladesh J. Pharmacol.*, vol. 10, no. 3, pp. 654–659, Jul. 2015, doi:  
583 10.3329/bjp.v10i3.23486.

584  
585  
586  
587  
588  
589  
590  
591  
592  
593  
594  
595  
596  
597  
598  
599  
600  
601  
602  
603  
604  
605  
606  
607  
608  
609  
610  
611  
612  
613  
614  
615  
616  
617  
618

619 **Figure (s)**

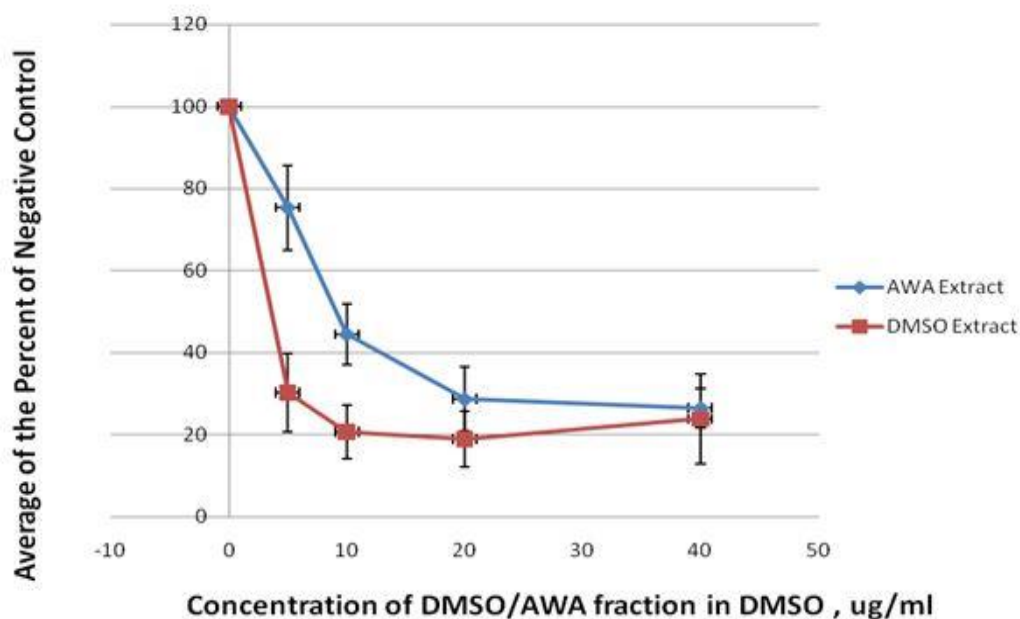

620

621

622

623

**Fig.1.** Comparison of dose-response of the antigen induced degranulation of BC extracts by DMSO (red color) and AWA (blue color) as percentages of negative control at the level of 5, 10, 20 and 40 µg/ml concentration.

624

625

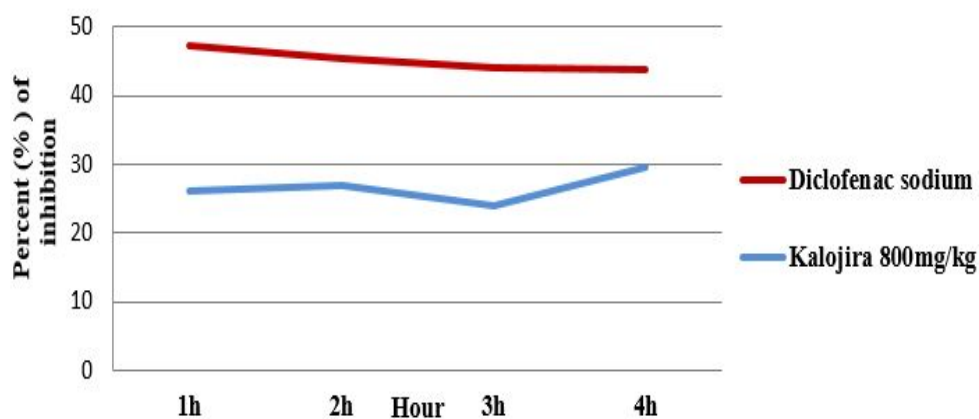

626

627

628

**Fig.2.** Time course in the changes of percent inhibition on carrageenan-induced paw edema volume of BC at 1, 2, 3, and 4 h at the dose of 800 mg/kg, p.o.

629

630

631





659 **Table 1:** Effects Black Cumin extracts by DMSO extracts of *BC* on carrageenan-induced  
660 paw in rats

| Group                 | Dose<br>(mg/kg,<br>p.o) | Paw edema volume <sup>a</sup><br>(ml) (% of inhibition) |                       |                        |                        |
|-----------------------|-------------------------|---------------------------------------------------------|-----------------------|------------------------|------------------------|
|                       |                         | 1 hr                                                    | 2 hr                  | 3 hr                   | 4 hr                   |
| Control               | --                      | 0.83 ± 0.02                                             | 0.96 ± 0.02           | 1.07 ± 0.02            | 1.18 ± 0.03            |
| Diclofenac sodium     | 50                      | 0.44 ± 0.0*<br>47.18                                    | 0.53 ± 0.02*<br>45.32 | 0.60 ± 0.01*<br>44.10  | 0.66 ± 0.01*<br>43.79  |
|                       | 200                     | 0.71 ± 0.01*<br>14.15                                   | 0.78 ± 0.01*<br>19.03 | 0.89 ± 0.02*<br>16.26  | 0.94 ± 0.03*<br>20.62  |
| <i>Nigella sativa</i> | 400                     | 0.63 ± 0.001*<br>23.39                                  | 0.74 ± 0.01*<br>23.52 | 0.83 ± 0.001*<br>21.88 | 0.85 ± 0.001*<br>27.69 |
|                       | 800                     | 0.61 ± 0.01*<br>26.21                                   | 0.70 ± 0.01*<br>26.99 | 0.81 ± 0.01*<br>24.06  | 0.83 ± 0.01*<br>29.66  |

<sup>a</sup> presented as mean ± SEM (n = 3)

\**p* < 0.05 compared with the control group (Dunnett's test)

661  
662

663 **Table 2:** Effect of Black Cumin extracts by DMSO on acetic acid-induced (0.6%) writhing  
664 in mice

| Group                 | Dose<br>(mg/kg,(p.o.) | No. of writhing <sup>a</sup> | % inhibition |
|-----------------------|-----------------------|------------------------------|--------------|
| Control               | --                    | 23.67 ± 1.2                  | --           |
| Diclofenac sodium     | 50                    | 14.70 ± .89**                | 37.89        |
|                       | 200                   | 18.01 ± 1.0*                 | 23.91        |
| <i>Nigella sativa</i> | 400                   | 17.35 ± 0.67*                | 26.65        |
|                       | 800                   | 16.62 ± 0.33*                | 29.78        |

<sup>a</sup> presented as mean ± SEM (n = 3)

\**p* < 0.05 compared with the control group (Dunnett's test)

\*\**p* < 0.001 compared with the control group (Dunnett's test)

665
